# Supplementary material for: GTP-binding of ARL-3 is activated by ARL-13 as a GEF and stabilized by UNC-119
Source: PubMed Central journal article supplement (PMC4840320; doi:10.1038/srep24534), 2016-04-22
Supplement: srep24534-s1.pdf [file srep24534-s1.pdf]

**Title: GTP-binding of ARL-3 is activated by ARL-13 as a GEF and stabilized by UNC-119.**

Qing Zhang<sup>1,3#</sup>, Yan Li<sup>1,3#</sup>, Yuxia Zhang<sup>1,3</sup>, Vicente Torres<sup>1,2</sup>, Peter Harris<sup>1,2,3</sup>, Kun Ling<sup>3</sup>,  
Jinghua Hu<sup>1,2,3</sup>, \*

**Supplementary Materials:**

**Supplementary Figure legends**

**Figure S1. UNC-119 localizes to the InV-like compartment of cilia.** (a). UNC-119 is highly conserved across ciliated species. *Ce*, *Caenorhabditis elegans*; *Cr*, *Chlamydomonas reinhardtii*; *Dr*: *Danio rerio*; *Mm*, *Mus musculus*; *Hs*, *Homo sapiens*. (b). *unc-119 (ed3)* mutants are dye-filling defective in phasmid cilia. The wild-type copy of GFP-tagged UNC-119 used in localization studies can fully rescue ciliogenesis defect of *unc-119* mutants. \*:  $p < 0.01$ . (c). GFP-tagged UNC-119 only localizes along the middle segment. mCherry-tagged  $\beta$ -tubulin TBB-4 was used to label the whole cilium. (d). The N-terminal sequence but not the PDE-delta domain is required for UNC-119 ciliary targeting. (e) Negative controls for BiFC studies. UNC-119, ARL-13, and ARL-3 do not show fluorescence complementation with IFT components (CHE-11 and IFT-20) in BiFC studies. Scale bar: 5  $\mu$ m. Arrowheads indicate the ciliary tip, and stars indicate the ciliary base.

**Figure S2. Characterization of UNC-119-ARL-13-ARL-3 association.** (a). The Palmitoylation or SUMOylation modification of ARL-13 is not required for its association with UNC-119 or ARL-3 in BiFC study. (b). Dominant negative ARL-3 or Dominant negative ARL-13 still show normal mutual interactions with other components in the UNC-119-ARL-13-ARL-3 module in BiFC study. (c). Deletion of UNC-119, or ARL-13, or ARL-3 does not affect the ciliary entry of other proteins in the UNC-119-ARL-13-ARL-3 module. mCherry-tagged MKS-5 was used to label the transition zone at the ciliary base. Arrows point to the abnormal bulge formed in residual cilia in *arl-13* mutants. (d). ARL-13 exclusively localizes to the middle segment of cilia in wide-type worms and mislocalizes to the dendrite and the cell body in *unc-119* mutants. E. *arl-3* mutants possess normal axonemal doublets. Scale bars: (a-d), 5  $\mu\text{m}$ ; E, 100 nm. Arrowheads indicate the ciliary tip, and stars indicate the ciliary base.

**Figure S3. ARL-13 promotes GDP release from ARL-3.** (a). All purified proteins used in this manuscript were showed here by SDS-PAGE and stained by Coomassie blue. 5 $\mu\text{g}$  protein was loaded in each lane. BSA served as indication for the protein amount. (b). ARL-13 but not UNC-119 accelerates GDP release from His-tagged ARL-3.

**Figure S4. The N terminal but not the C terminal domain of ARL-13 can accelerates GDP release from GST-ARL-3.** (a). GEF activity of the indicated concentrations of ARL-13 for 0.05  $\mu\text{M}$  ARL-3 $\cdot$ mantGDP.  $K_{obs}$  ( $\text{s}^{-1}\times 10^{-3}$ ) and fold change are shown in the table below the graph. (b). ARL-3 $\cdot$ GTP cannot promote nucleotide dissociation of ARL-

13·mantGppNHp. (c). The N-terminal domain of ARL-13 containing the GTPase domain (1-176aa) and the coil-coil domain (177-250aa) is able to accelerate the GDP release from ARL-3·mantGDP. (d). Adding UNC-119 together with FL or truncated ARL-13 does not change the nucleotide exchange rate of ARL-3.

**Figure S5. ARL-3 and ARL-13 show no intrinsic GTP hydrolysis activity.** No GTP hydrolysis was detected when mixing Mant-GTP with either ARL-3 or ARL-3 +ARL-13 at room temperature (a) or 37°C (b) for 60 min. RhoA and RhoA GAP (P50) served as positive control. (c). GFP-tagged ARL-3(T31N) normally localizes in cilia. mCherry-tagged MKS-5 was used to label the transition zone at the ciliary base. Scale bars: 5 µm; The arrowhead indicates the ciliary tip, and the star indicates the ciliary base.

# Supplementary Fig. 1

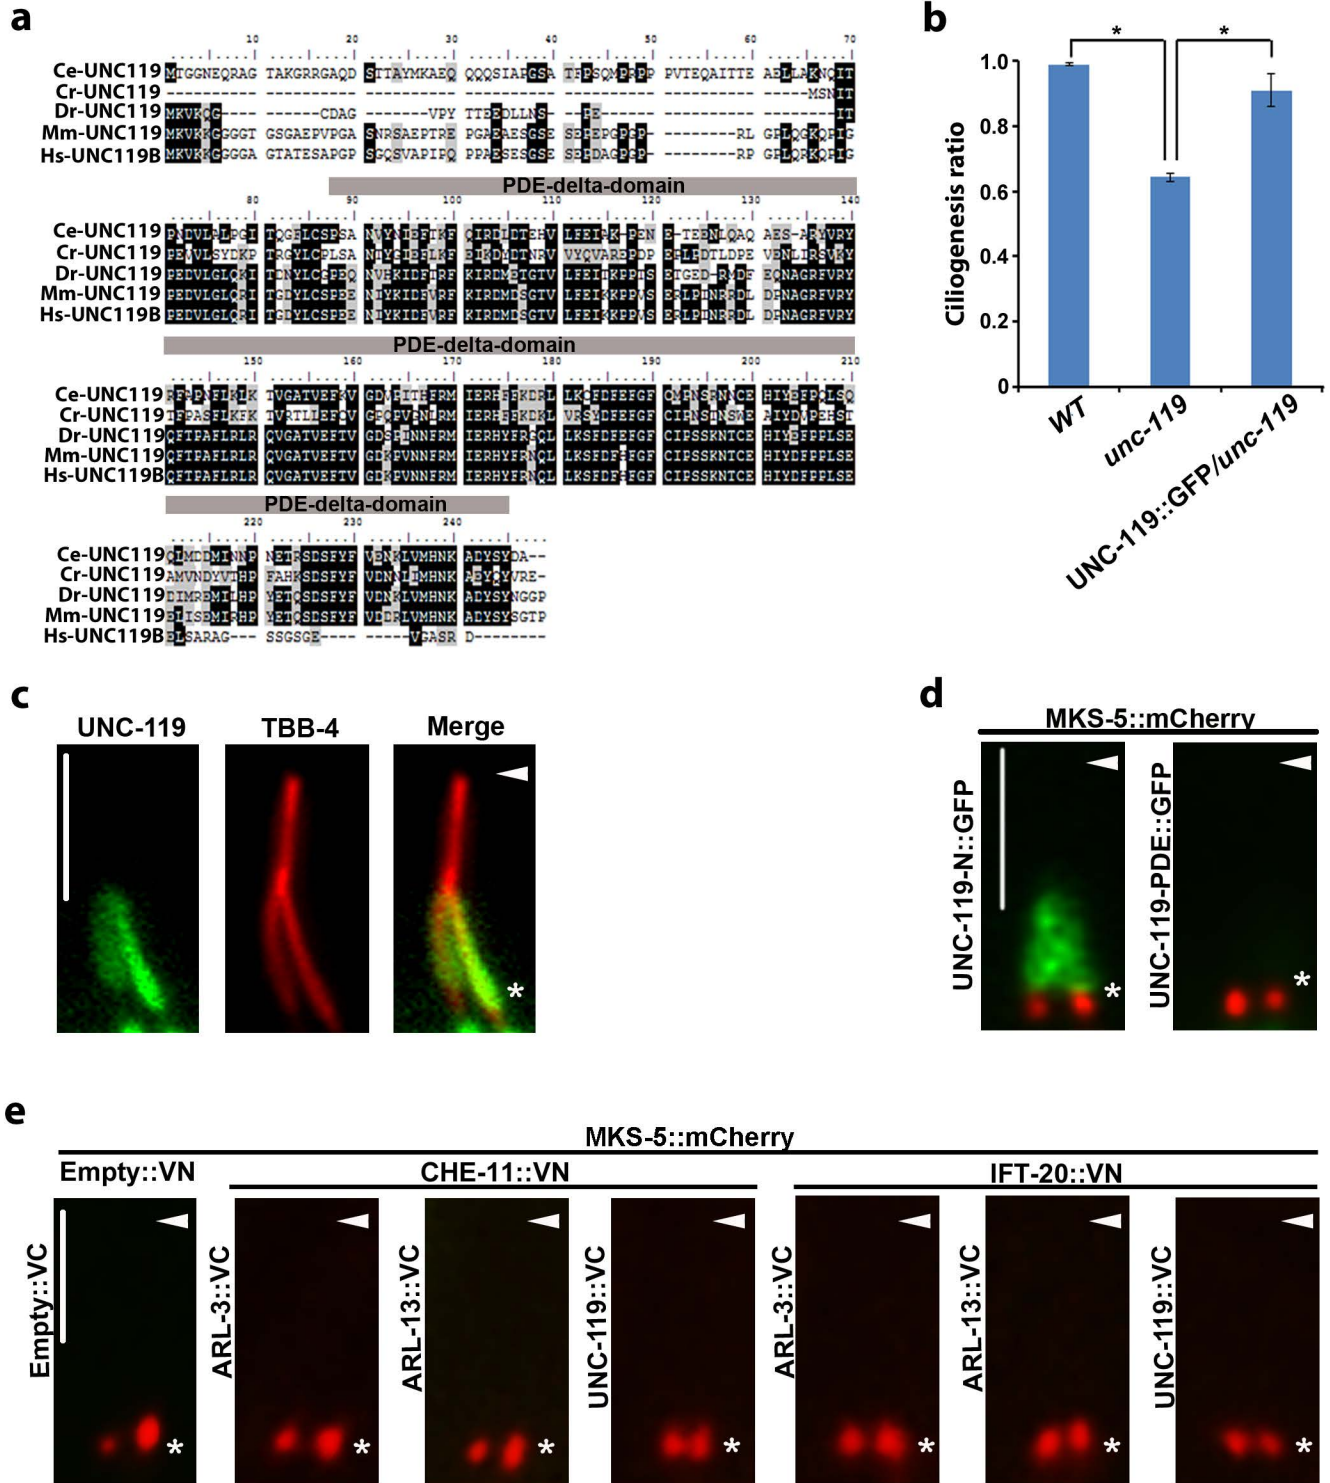

# Supplementary Fig. 2

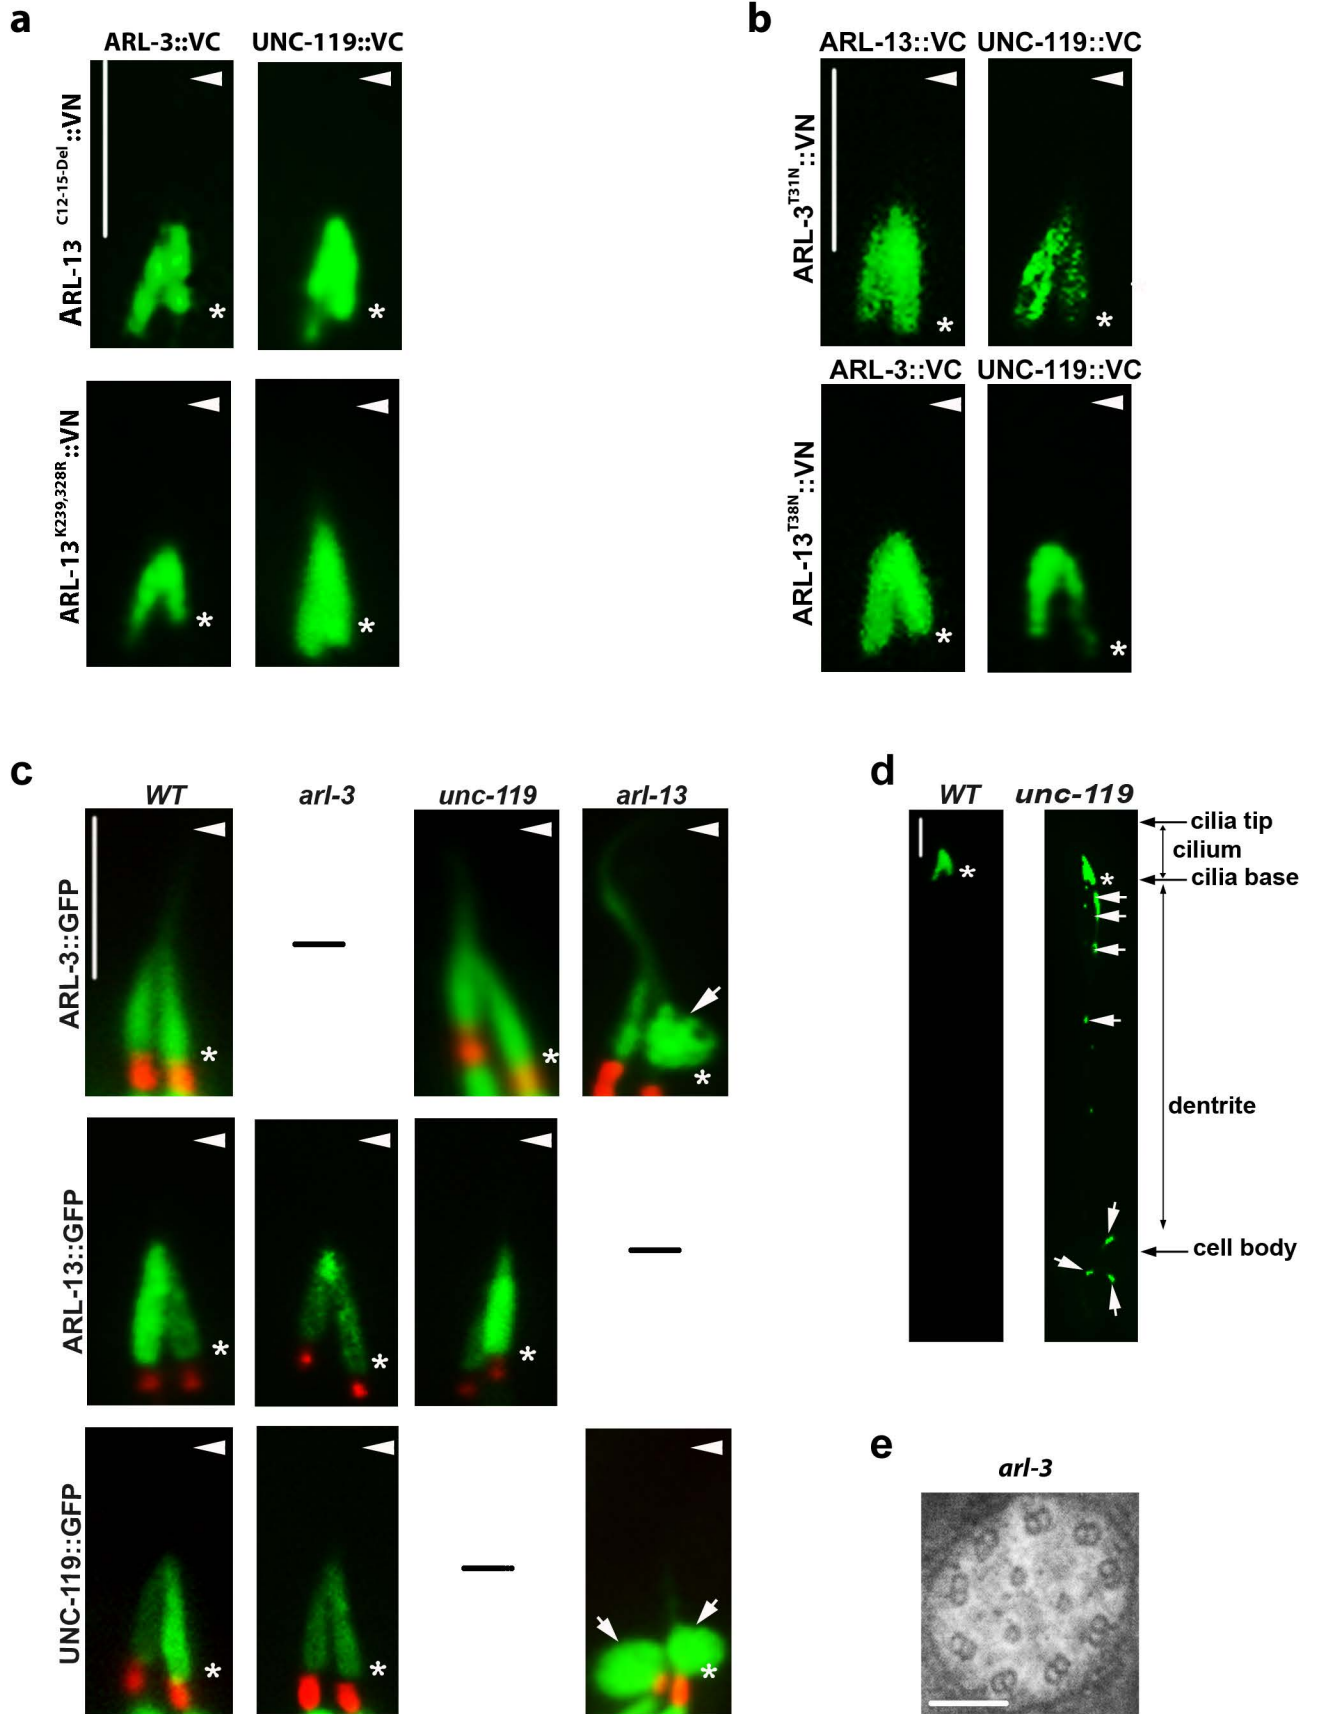

# Supplementary Fig. 3

**a**

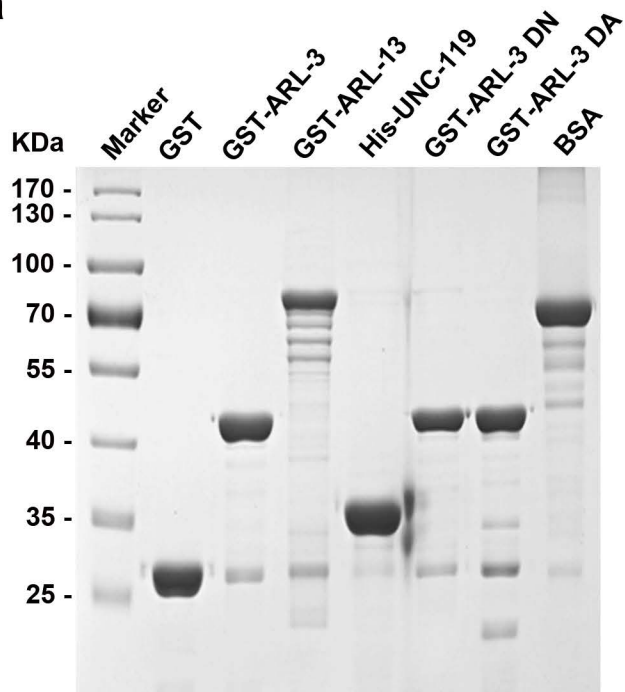

**b**

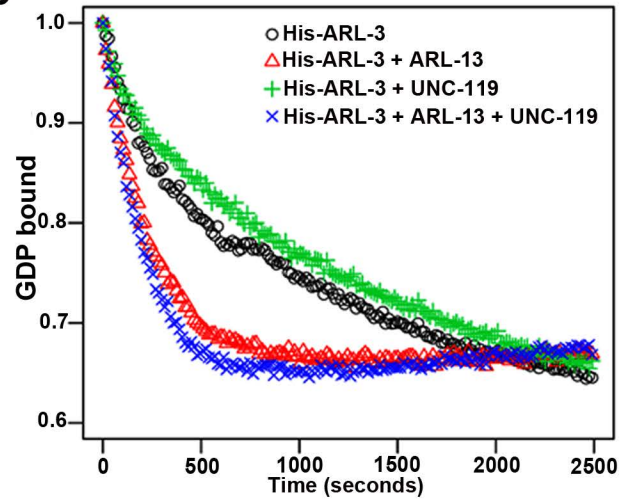

|                              | $k_{obs}$ ( $s^{-1} \times 10^{-3}$ ) | Fold stimulation |
|------------------------------|---------------------------------------|------------------|
| His-ARL-3                    | $1.07 \pm 0.03$                       | -                |
| His-ARL-3 + ARL-13           | $4.74 \pm 1.13$                       | 4.45             |
| His-ARL-3 + UNC-119          | $0.83 \pm 0.04$                       | 0.78             |
| His-ARL-3 + ARL-13 + UNC-119 | $7.66 \pm 0.43$                       | 7.19             |

# Supplementary Fig. 4

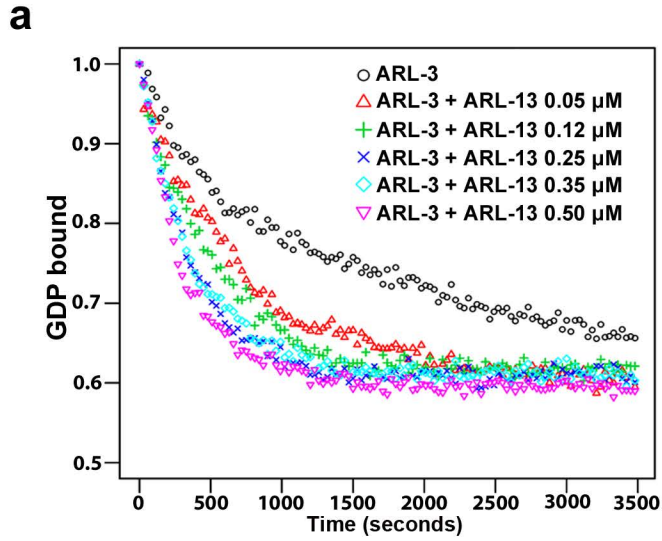

| mantGDP-GST-ARL-3   |                                       |                  |
|---------------------|---------------------------------------|------------------|
|                     | $K_{obs}$ ( $S^{-1} \times 10^{-3}$ ) | Fold stimulation |
| None                | $0.59 \pm 0.03$                       | -                |
| ARL-13 0.05 $\mu$ M | $1.45 \pm 0.06$                       | 2.44             |
| ARL-13 0.12 $\mu$ M | $2.53 \pm 0.36$                       | 4.26             |
| ARL-13 0.25 $\mu$ M | $2.78 \pm 0.16$                       | 4.69             |
| ARL-13 0.35 $\mu$ M | $2.83 \pm 0.08$                       | 4.76             |
| ARL-13 0.5 $\mu$ M  | $2.71 \pm 0.06$                       | 4.57             |

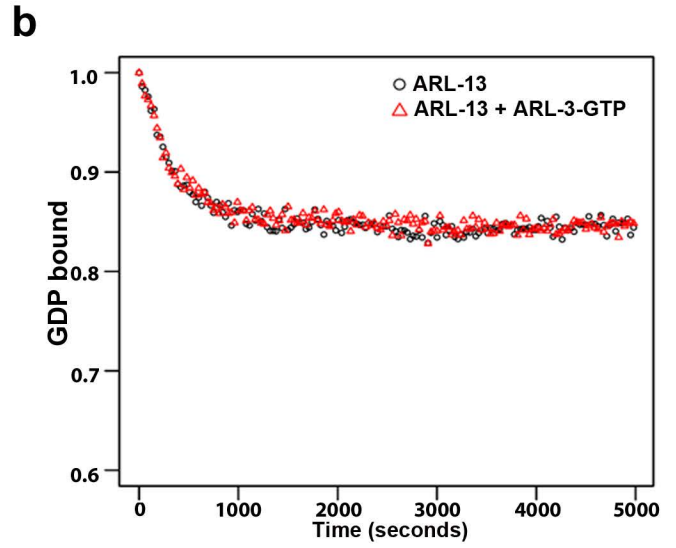

| mantGppNHp-GST-ARL-13 |                                       |                  |
|-----------------------|---------------------------------------|------------------|
|                       | $K_{obs}$ ( $S^{-1} \times 10^{-3}$ ) | Fold stimulation |
| None                  | $2.87 \pm 0.13$                       | -                |
| ARL-3-GTP             | $2.66 \pm 0.22$                       | 0.93             |

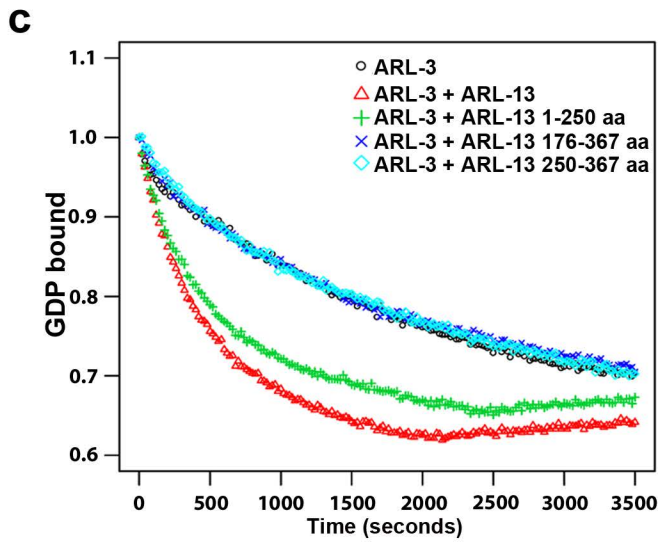

| mantGDP-GST-ARL-3 |                                       |                  |
|-------------------|---------------------------------------|------------------|
|                   | $K_{obs}$ ( $S^{-1} \times 10^{-3}$ ) | Fold stimulation |
| None              | $0.50 \pm 0.02$                       | -                |
| ARL-13            | $1.79 \pm 0.03$                       | 3.57             |
| ARL-13 1-250aa    | $1.38 \pm 0.04$                       | 2.74             |
| ARL-13 176-367aa  | $0.51 \pm 0.03$                       | 1.01             |
| ARL-13 250-367aa  | $0.58 \pm 0.04$                       | 1.16             |

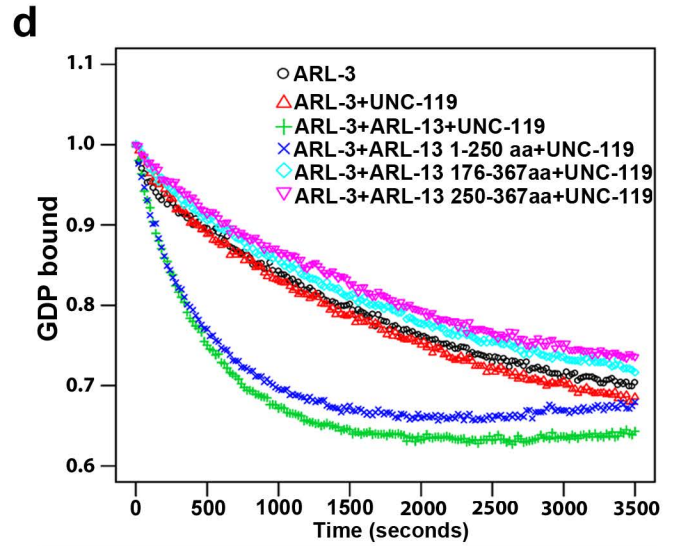

| mantGDP-GST-ARL-3          |                                       |                  |
|----------------------------|---------------------------------------|------------------|
|                            | $K_{obs}$ ( $S^{-1} \times 10^{-3}$ ) | Fold stimulation |
| None                       | $0.50 \pm 0.02$                       | -                |
| ARL-3 + UNC-119            | $0.50 \pm 0.01$                       | 0.98             |
| ARL-13 + UNC-119           | $2.23 \pm 0.10$                       | 4.44             |
| ARL-13 1-250aa + UNC-119   | $2.06 \pm 0.03$                       | 4.11             |
| ARL-13 176-367aa + UNC-119 | $0.50 \pm 0.03$                       | 1.00             |
| ARL-13 250-367aa + UNC-119 | $0.50 \pm 0.01$                       | 0.99             |

# Supplementary Fig. 5

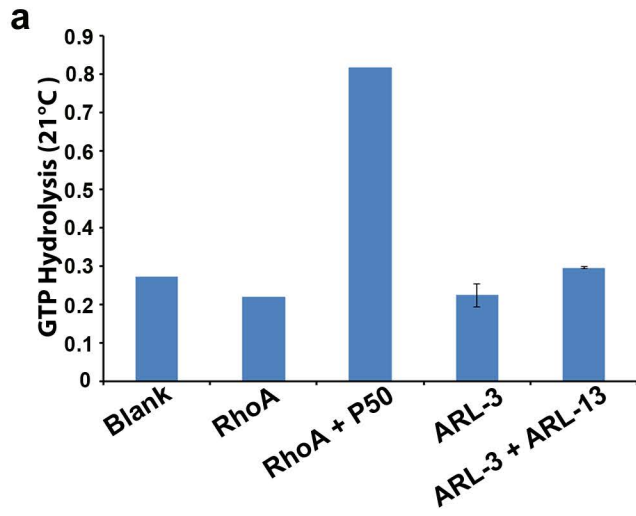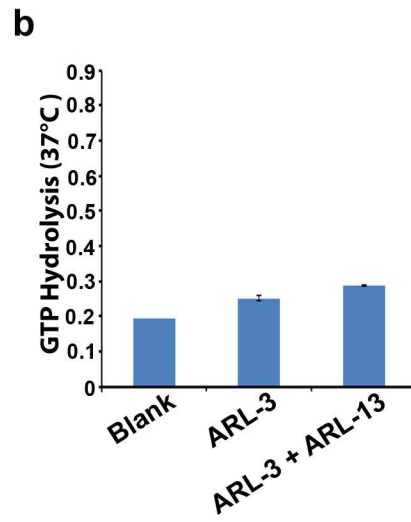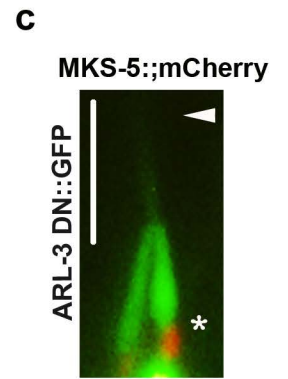



**Table S1. Transgenic strains used in this study**

| <b>Strain name</b> | <b>Genotype</b>                                                              |
|--------------------|------------------------------------------------------------------------------|
| ZP1863             | <i>arl-3 (tm1703); arl-13 (gk513)</i>                                        |
| ZP1865             | <i>arl-3 (tm1703); arl-13 (gk513); unc-119 (ed3)</i>                         |
| ZP1866             | <i>arl-13 (gk513); [Parl-13::UNC-119::GFP; Parl-13::TBB-4::mCherry; PR4]</i> |
| ZP1867             | <i>arl-3 (tm1703); [UNC-119::VN; ARL-13::VC; PR4]</i>                        |
| ZP1870             | <i>N<sub>2</sub> [ARL-13T38N::VN; ARL-3::VC; PR4]</i>                        |
| ZP1871             | <i>N<sub>2</sub> [ARL-13T38N::VN; UNC-119::VC; PR4]</i>                      |
| ZP1886             | <i>arl-3 (tm1703); unc-119 (ed3)</i>                                         |
| ZP1887             | <i>unc-119 (ed3); [Parl-13::ARL-13::GFP]</i>                                 |
| ZP1889             | <i>arl-13 (gk513); [ARL-3::VN; UNC-119::VC; RP4]</i>                         |
| ZP1892             | <i>arl-13 (gk513); him8</i>                                                  |
| ZP1893             | <i>N<sub>2</sub> [ARL-13::VN; ARL-3::VC; ccGFP]</i>                          |
| ZP1895             | <i>N<sub>2</sub> [ARL-3::VN; UNC-119::VC; ccGFP]</i>                         |
| ZP1900             | <i>N<sub>2</sub> [ARL-13::VN; UNC-119::VC; MKS-5::mCherry; ccGFP]</i>        |
| ZP1901             | <i>N<sub>2</sub> [ARL-13::VN; ARL-3::VC; MKS-5::mCherry; ccGFP]</i>          |
| ZP1905             | <i>N<sub>2</sub> [ARL-3::VN; UNC-119::VC; MKS-5::mCherry; ccGFP]</i>         |
| ZP1910             | <i>arl-3 (tm1703); OSM-6::GFP</i>                                            |
| ZP1911             | <i>unc-119 (ed3); OSM-6::GFP</i>                                             |
| ZP1912             | <i>arl-3 (tm1703); arl-13 (gk513); OSM-6::GFP</i>                            |
| ZP1913             | <i>arl-3 (tm1703); unc-119 (ed3); OSM-6::GFP</i>                             |
| ZP1914             | <i>unc-119 (ed3); OSM-6::GFP</i>                                             |
| ZP1916             | <i>N<sub>2</sub> [Parl-13::ARL-3::GFP; MKS-5::mCherry; PR4]</i>              |
| ZP1917             | <i>unc-119 (ed3) [Parl-13::ARL-3::GFP; MKS-5::mCherry; PR4]</i>              |
| ZP1919             | <i>N<sub>2</sub> [Parl-13::UNC-119::GFP; MKS-5::mCherry; PR4]</i>            |
| ZP1920             | <i>arl-3 (tm1703); [Parl-13::UNC-119::GFP; MKS-5::mCherry; PR4]</i>          |
| ZP1921             | <i>arl-13 (gk513); [Parl-13::UNC-119::GFP; MKS-5::mCherry; PR4]</i>          |
| ZP1926             | <i>unc-119 (ed3); [Parl::ARL-13::GFP]</i>                                    |
| ZP1927             | <i>arl-3 (tm1703); [Parl::ARL-13::GFP]</i>                                   |
| ZP1953             | <i>arl-13 (gk513); unc-119 (ed3)</i>                                         |
| ZP1959             | <i>N<sub>2</sub> [Parl-13::ARL-13::GFP; MKS-5::mCherry; PR4]</i>             |
